# Supplementary material
Source: PubMed Central journal article supplement (PMC4210280)
Supplement: pnas.201407610SI.pdf [file pnas.201407610SI.pdf]

# Supporting Information

Chaves-Sanjuan et al. 10.1073/pnas.1407610111

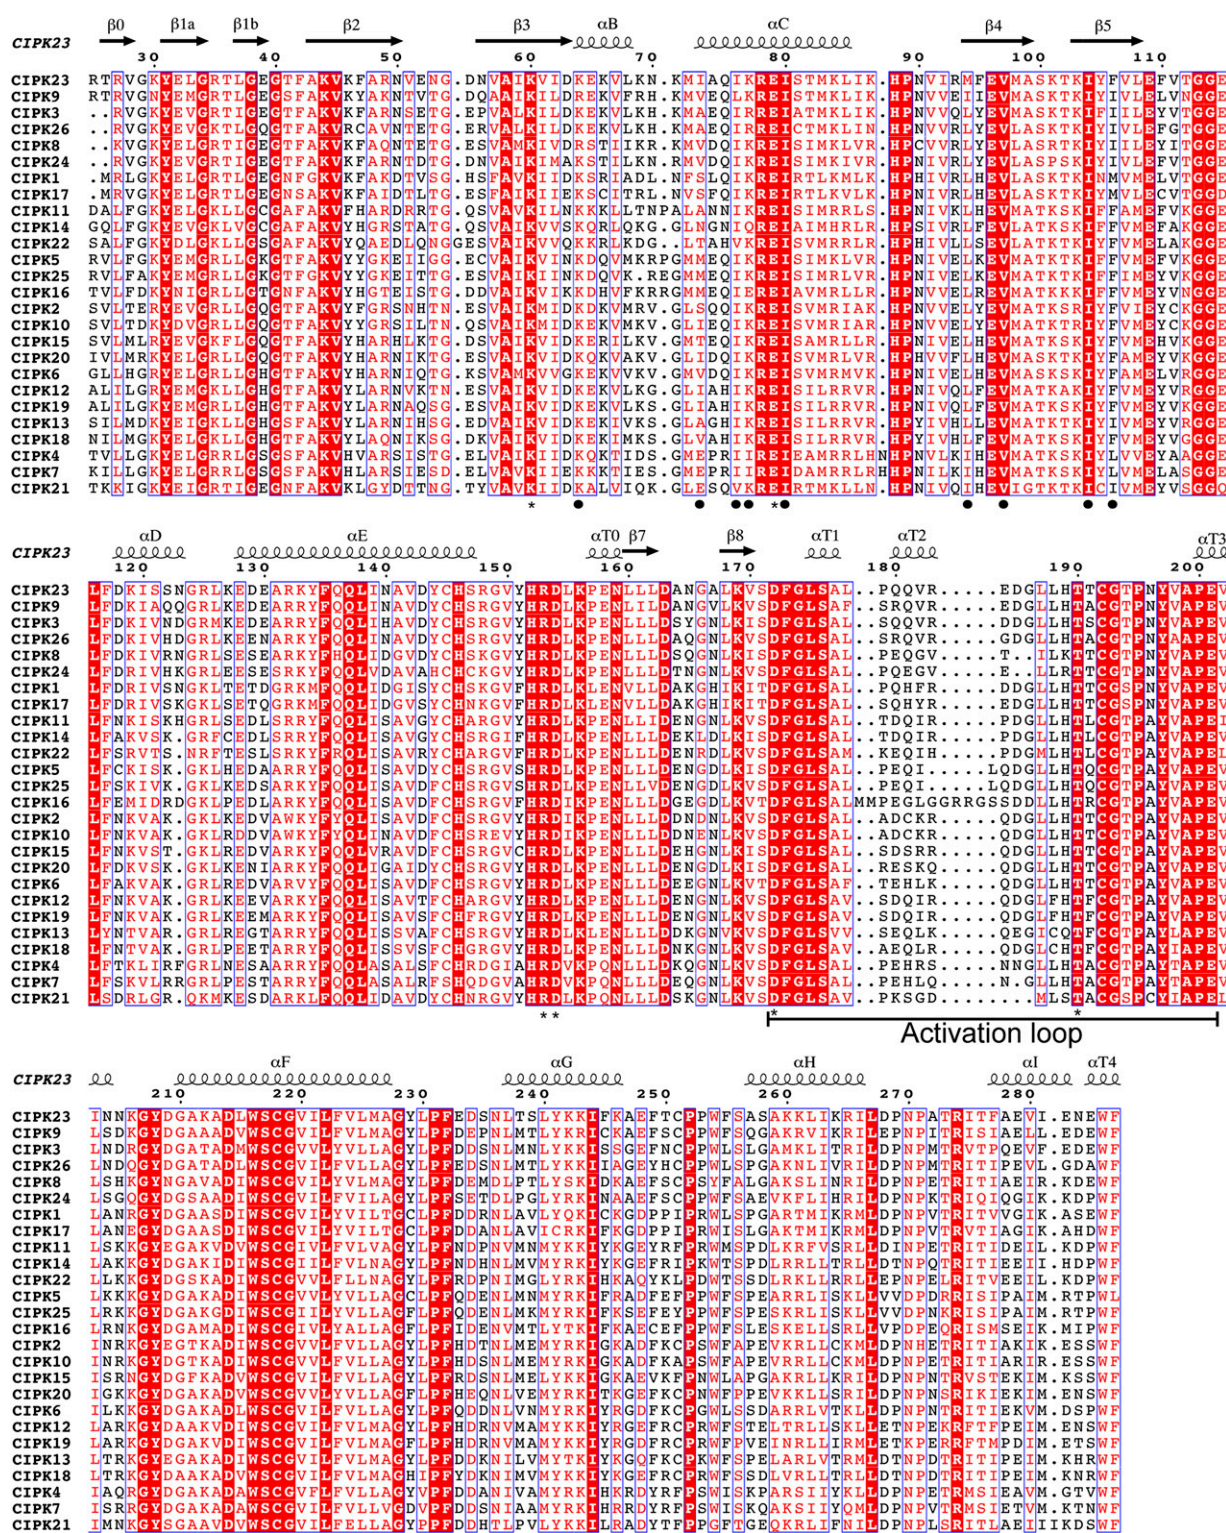

Fig. S1. Alignment comparing the amino acid sequences of the catalytic domain of CIPKs (1). The positions of the CIPK23ΔC T190D secondary structure elements determined from the crystal structure are shown above the sequences (2). Residues are colored according to their conservation (3). Catalytically relevant residues and residues involved in CHAPS binding are highlighted with a black dot and with an asterisk, respectively.

1. Thompson JD, Gibson TJ, Higgins DG (2002) Multiple sequence alignment using ClustalW and ClustalX. *Curr Protoc Bioinformatics* Chapter 2:Unit 2.3.
2. Kabsch W, Sander C (1983) Dictionary of protein secondary structure: pattern recognition of hydrogen-bonded and geometrical features. *Biopolymers* 22(12):2577–2637.
3. Gouet P, Courcelle E, Stuart DI, Métoz F (1999) ESPript: Analysis of multiple sequence alignments in PostScript. *Bioinformatics* 15(4):305–308.

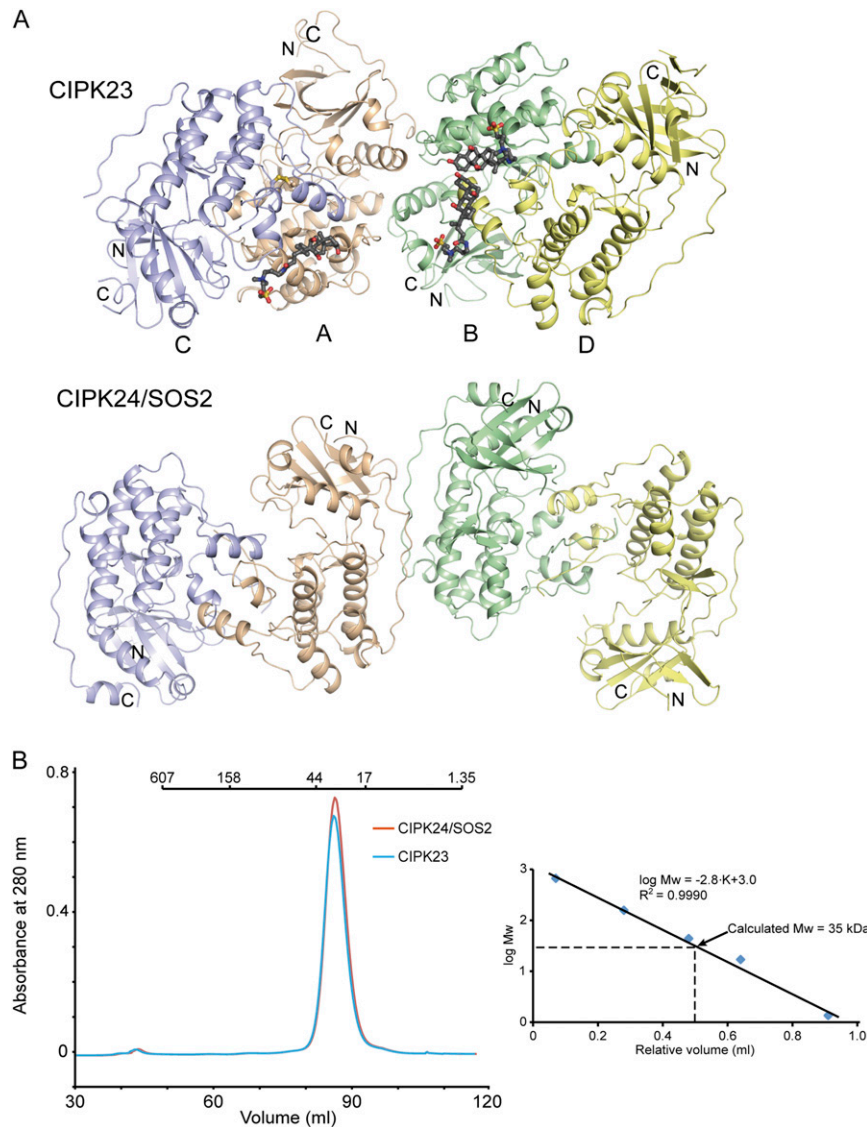

**Fig. S2.** (A) CIPK23 $\Delta$ C T190D and CIPK24/SOS2 $\Delta$ C T168D crystal packing interactions within the asymmetric unit. A ribbon representation of those molecules constituting the asymmetric unit. The  $C\alpha$  rmsd between the different molecules found in the asymmetric unit ranges from 0.7 to 1.0 Å in the case of  $\Delta$ C, and from 0.5 to 0.7 Å in CIPK24/SOS2 $\Delta$ C T168D (1). The residues forming a disulfide bridge between equivalent CIPK23 Cys192 of monomers within the asymmetric unit are displayed in a stick representation. Formation of the disulfide bridge is likely a crystallization artifact since increasing the TCEP concentration in the crystallization drop from 0.25 mM to 2.5 mM inhibits CIPK23 $\Delta$ C T190D crystallization. A topologically equivalent disulfide bond was observed in Snf1 MARK2 kinase with no biological implications (2). (B) The oligomeric state of CIPK23 $\Delta$ C T190D (red) and CIPK24/SOS2 $\Delta$ C T168D (blue) in solution as shown by gel filtration chromatography.

1. Emsley P, Lohkamp B, Scott WG, Cowtan K (2010) Features and development of Coot. *Acta Crystallogr D Biol Crystallogr* 66(Pt 4):486–501.
2. Panneerselvam S, Marx A, Mandelkow EM, Mandelkow E (2006) Structure of the catalytic and ubiquitin-associated domains of the protein kinase MARK/Par-1. *Structure* 14(2):173–183.

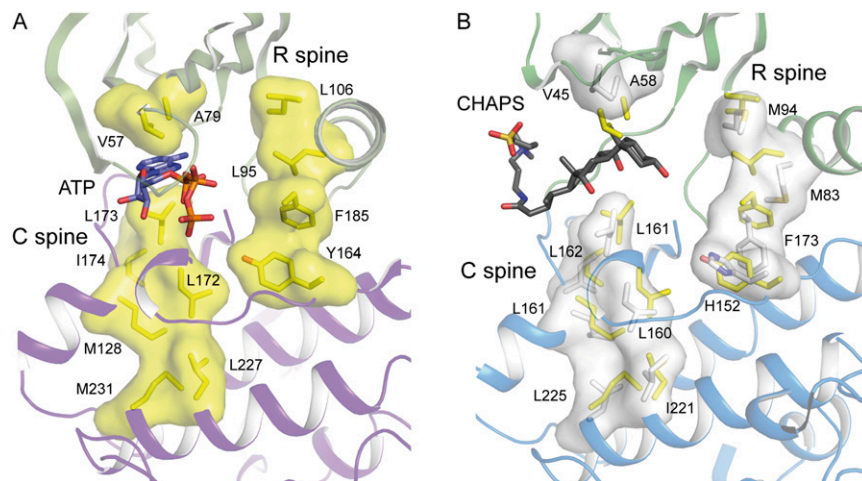

**Fig. S3.** The local spatial pattern alignment have been efficiently used to identify two structural motives composed by spines of hydrophobic residues that are conserved in active kinases but not in the inactive ones (1). One of them is the regulatory spine or R spine, which consist in four residues, two from the N lobe and two from the C lobe. The second spine is the catalytic spine or C spine. It is conformed by two residues from the N lobe, the adenine ring from the ATP, and other six residues from the C lobe. (A) A molecular surface representation of the C and R spines of the PKA active kinase (PDB ID code: 1ATP). Residues forming the spines are represented as yellow sticks. (B) A molecular surface representation of the topologically equivalent spines of CIPK23. Residues forming the spines are displayed as white sticks and overlaid to those forming the PKA spines. According to the inactive state of CIPK23, the residues are not aligned along the two spines. Met83 at  $\alpha$ C breaks the R spine because it is not stacked between residues Met94 and F173. C spine is broken at the ATP binding site because of the presence of a CHAPS molecule and the open conformation of the N lobe with respect to the C lobe.

1. Taylor SS, Kornev AP (2011) Protein kinases: Evolution of dynamic regulatory proteins. *Trends Biochem Sci* 36(2):65–77.

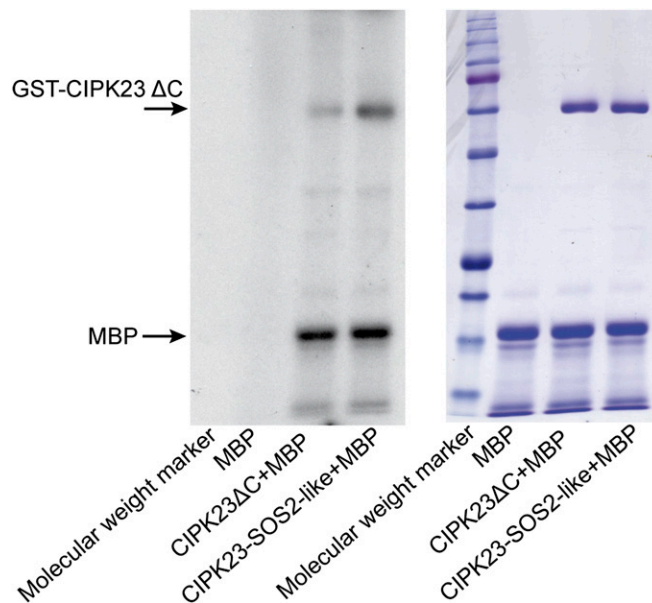

**Fig. S4.** A mutant CIPK23 protein converted into a CIPK24/SOS2-like protein by the replacement of the CIPK23 activation loop with that of CIPK24/SOS2 displays enhanced autophosphorylation kinase activity. The autoradiograph showing the CIPK23 $\Delta$ C and CIPK23-SOS2-like in vitro kinase assay is shown (Left). The reaction mixture contains myelin basic protein (MBP) as substrate in the presence of [ $^{32}$ P]ATP. (Right) The Coomassie-stained gel is shown. CIPK23-SOS2-like construct was prepared by the mutation of Val182Gly Arg183Val and His189Arg and the deletion of Asp185 and Gly186. The proteins were purified from *S. cerevisiae* as GST fusions because CIPK23-SOS2-Like protein was insoluble when expressed in *E. coli*.

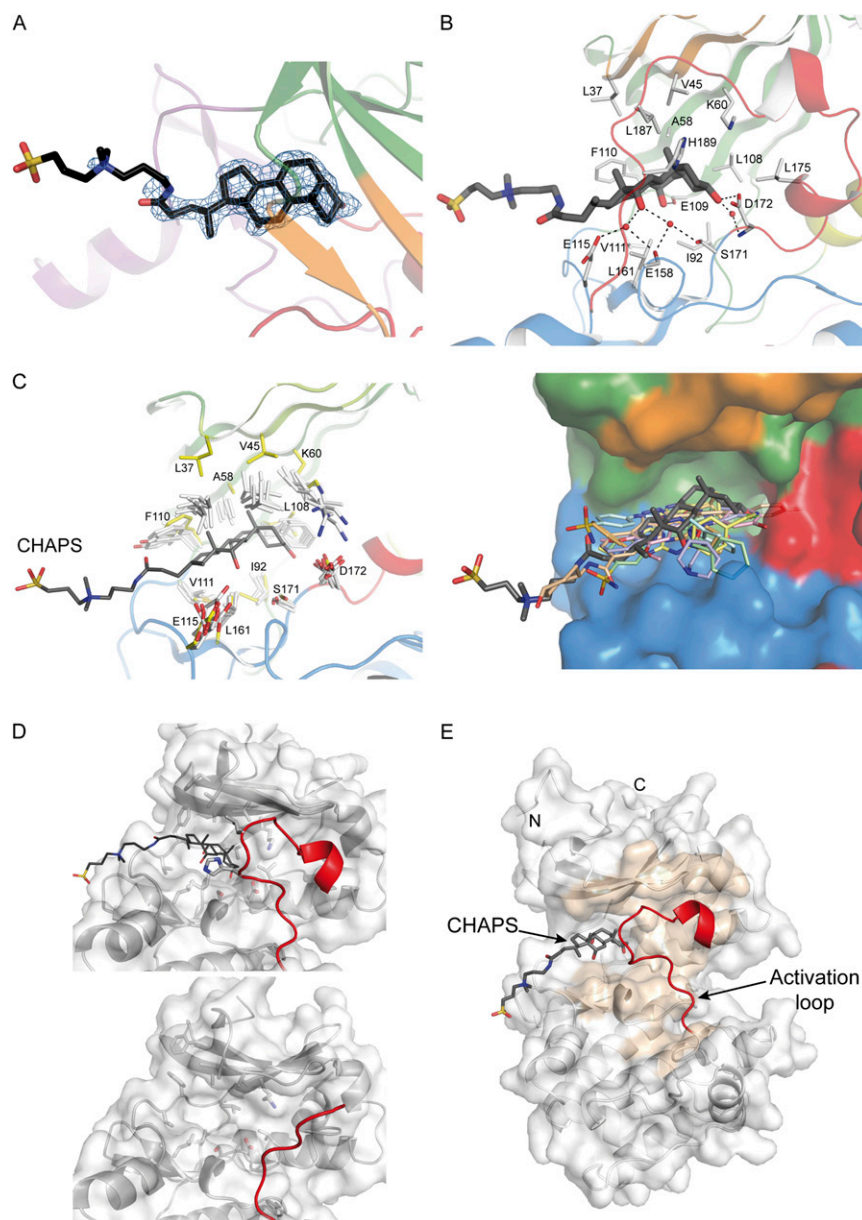

**Fig. S5.** The CHAPS molecule at ATP binding pocket. (A) A section of the simulated annealed omit Fo-Fc electron density map at the ATP binding pocket defines the cholate ring of a CHAPS molecule. (B) A representation of the pattern of interactions between the CHAPS molecule and CIPK23ΔC T190D. The interacting residues are labeled and displayed in a stick representation. Hydrogen bonds are displayed as dashed lines. Water molecules are represented as red spheres. (C) Superimpositions of the closest structures to CIPK23ΔC T190D at the ATP binding pocket. (C, Left) Overlay of the binding sites. (C, Right) Overlay of the bounded ligands (PDB ID codes: 3BH8, 1DI8, 3PJ8, 2W40, 2GDO, 2E9N, and 2C6O). (D) A cartoon representation of the ATP/NAF binding site in CIPK23ΔC T190D (Upper) and CIPK24/SOS2ΔC T168D (Lower). The positions of the residues around the cholate ring, in sticks, are roughly conserved in both structures, implying that the binding of the CHAPS molecule is not affecting the overall cavity conformation. (E) A surface representation of the CIPK23ΔC T190D and the activation loop interacting surface. The calculated CIPK23ΔC T190D surface area buried by the accessible moiety of the activation loop is 757 Å<sup>2</sup> (displayed in brown). The contribution of the cholate ring to this area is less than 6% through its interaction with Leu-187 and His-189 (1), suggesting that CHAPS binding does not affect the conformation of the activation loop, although it cannot be discarded local effects in the vicinity of Leu-187. The CHAPS molecule and Leu-187 and His-189 are represented in stick mode and the activation loop in a cartoon mode.

1. Hubbard SJ, Thornton JM (1993) NACCESS Computer Program (Department of Biochemistry and Molecular Biology, University College London, London).
